# Supplementary material
Source: publisher site journal article supplement (https://www.dovepress.com/article/559530)
Supplement: Supplementary file 1 [file 559530%20Supplementary%20Material.docx]

**

**

**Supplementary Figure 1. Study flow diagram**

Flow diagram illustrating patient selection, cohort allocation, data processing, variable selection, nomogram construction, and model validation.

**
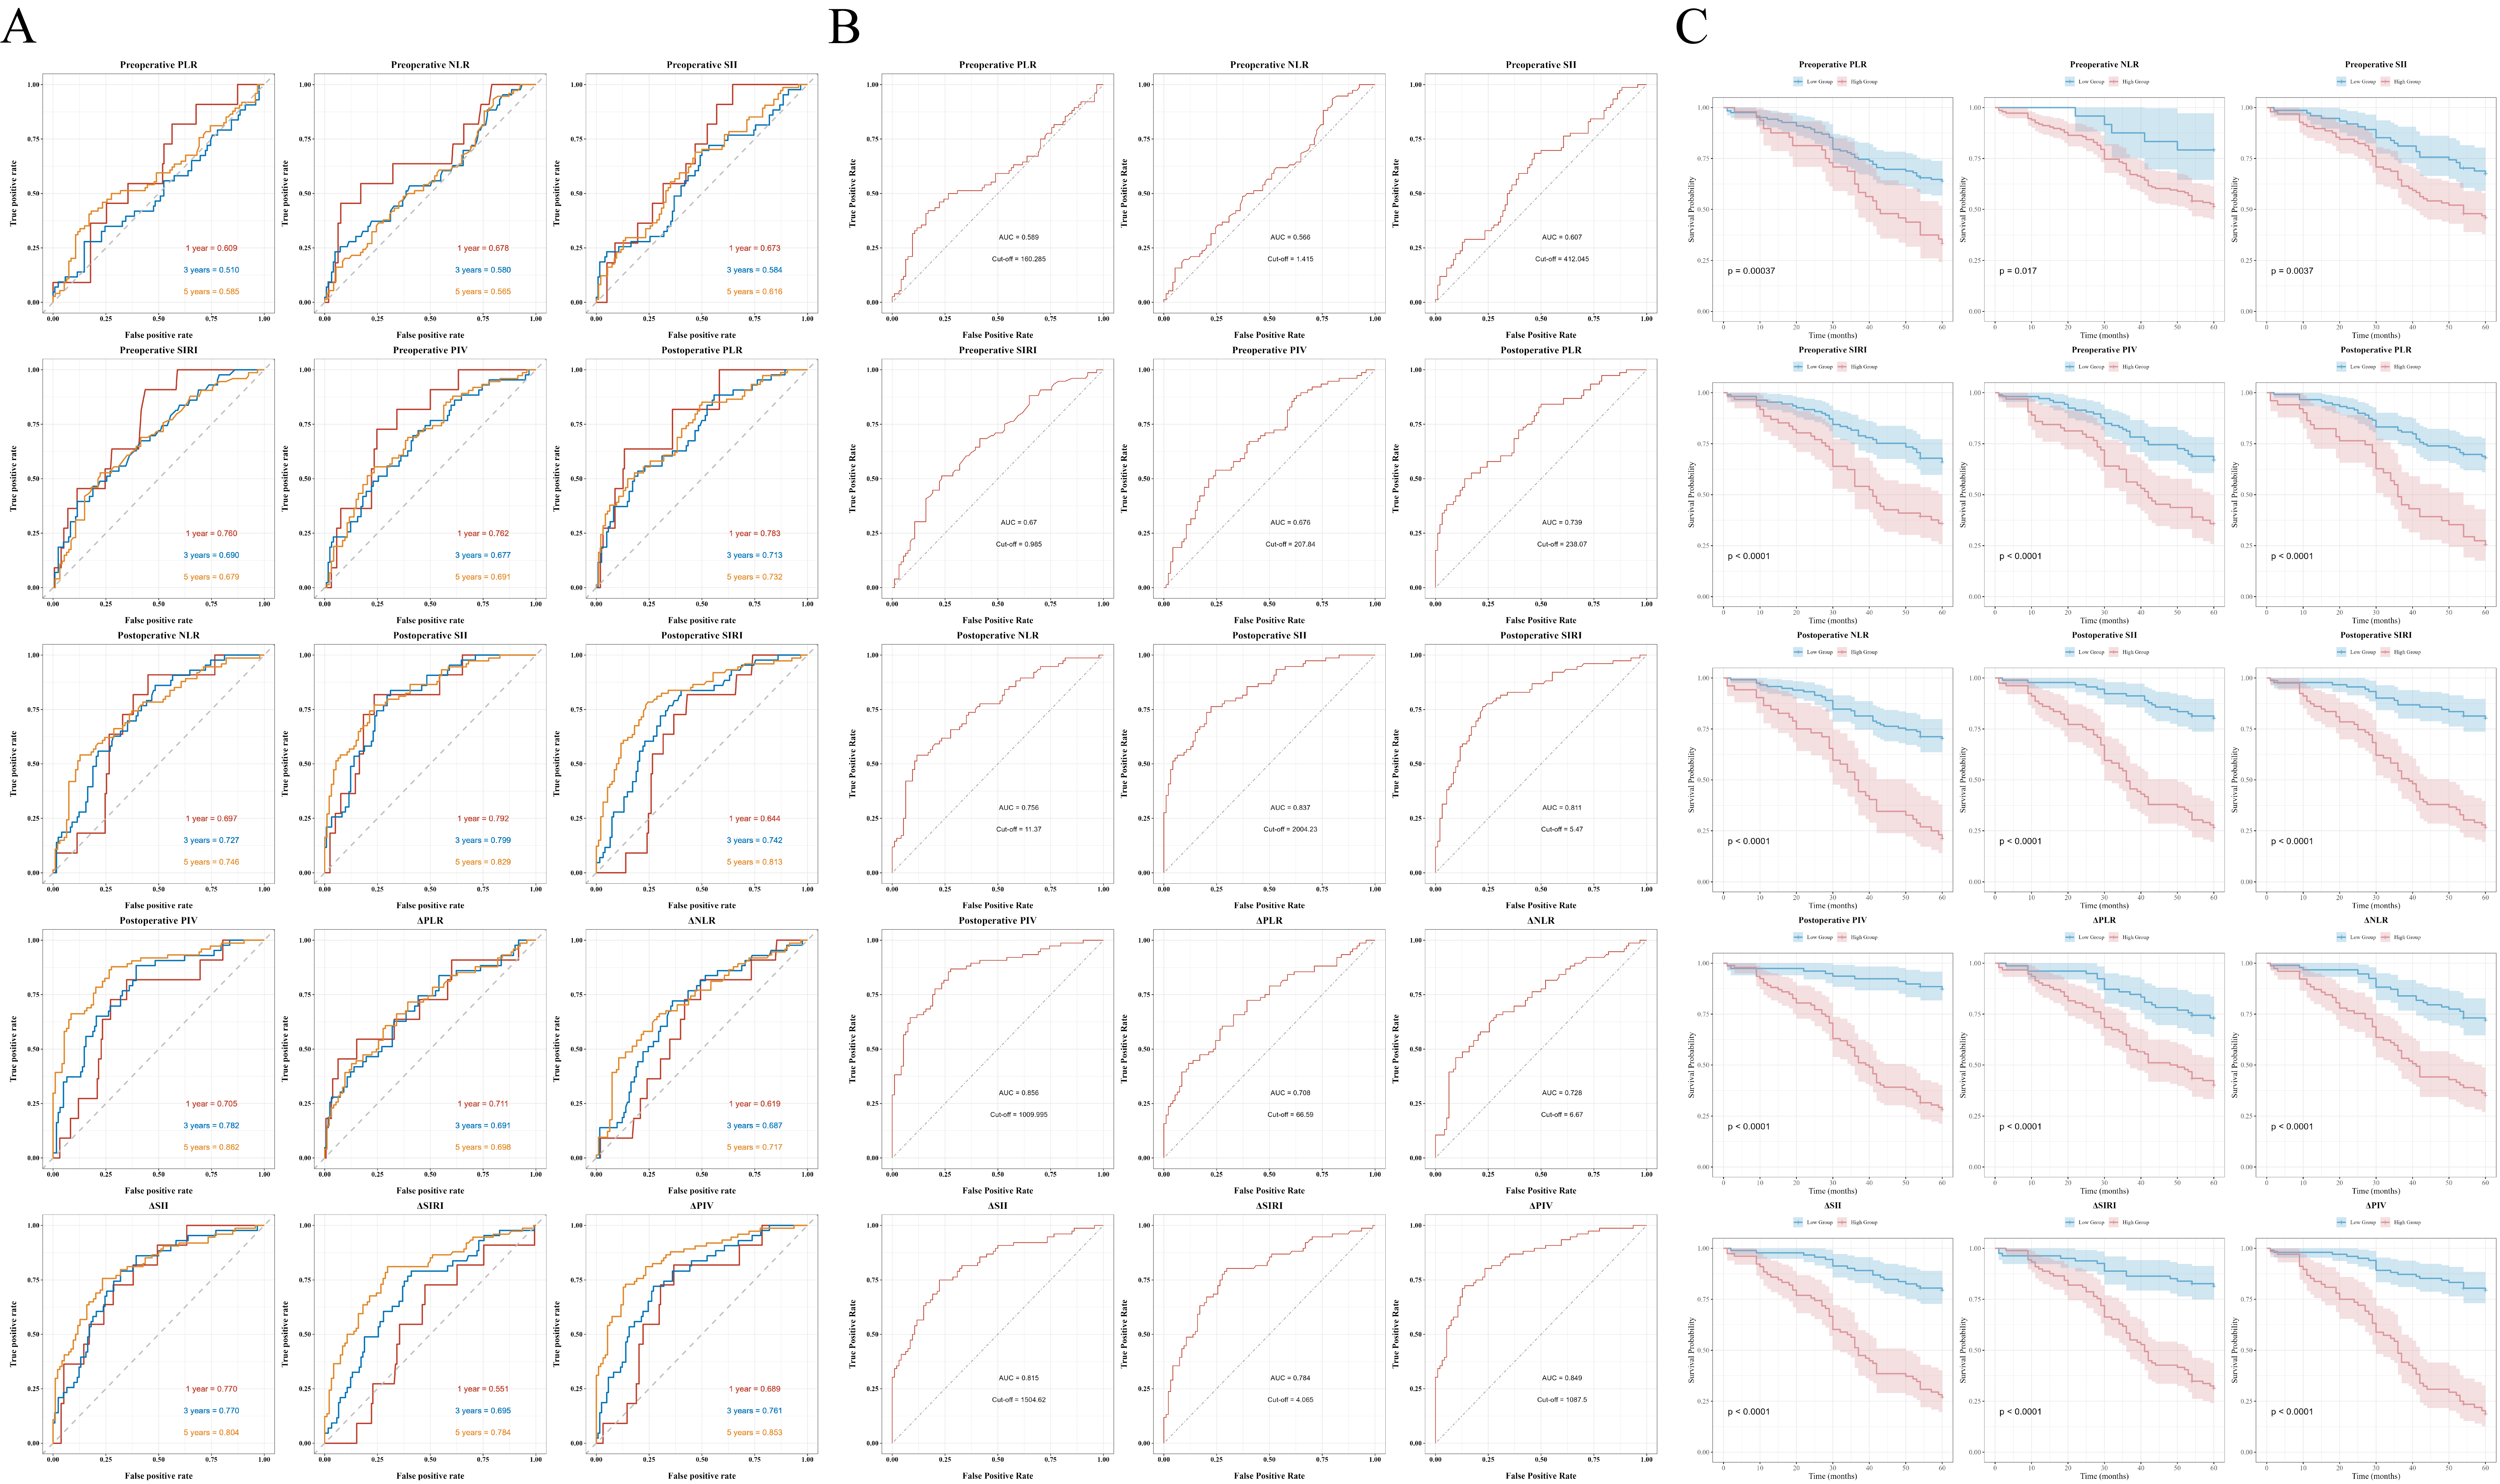
**

**Supplementary Figure 2. Prognostic performance of perioperative inflammatory indices**

(A) ROC curves and optimal cut-off values (Youden index) for perioperative inflammatory indices (PLR, NLR, SII, SIRI, PIV; preoperative, postoperative, and dynamic). (B) Time-dependent ROC curves at 1-, 3-, and 5-year overall survival. (C) Kaplan–Meier survival curves stratified by high and low groups according to ROC-derived cut-off values.

**
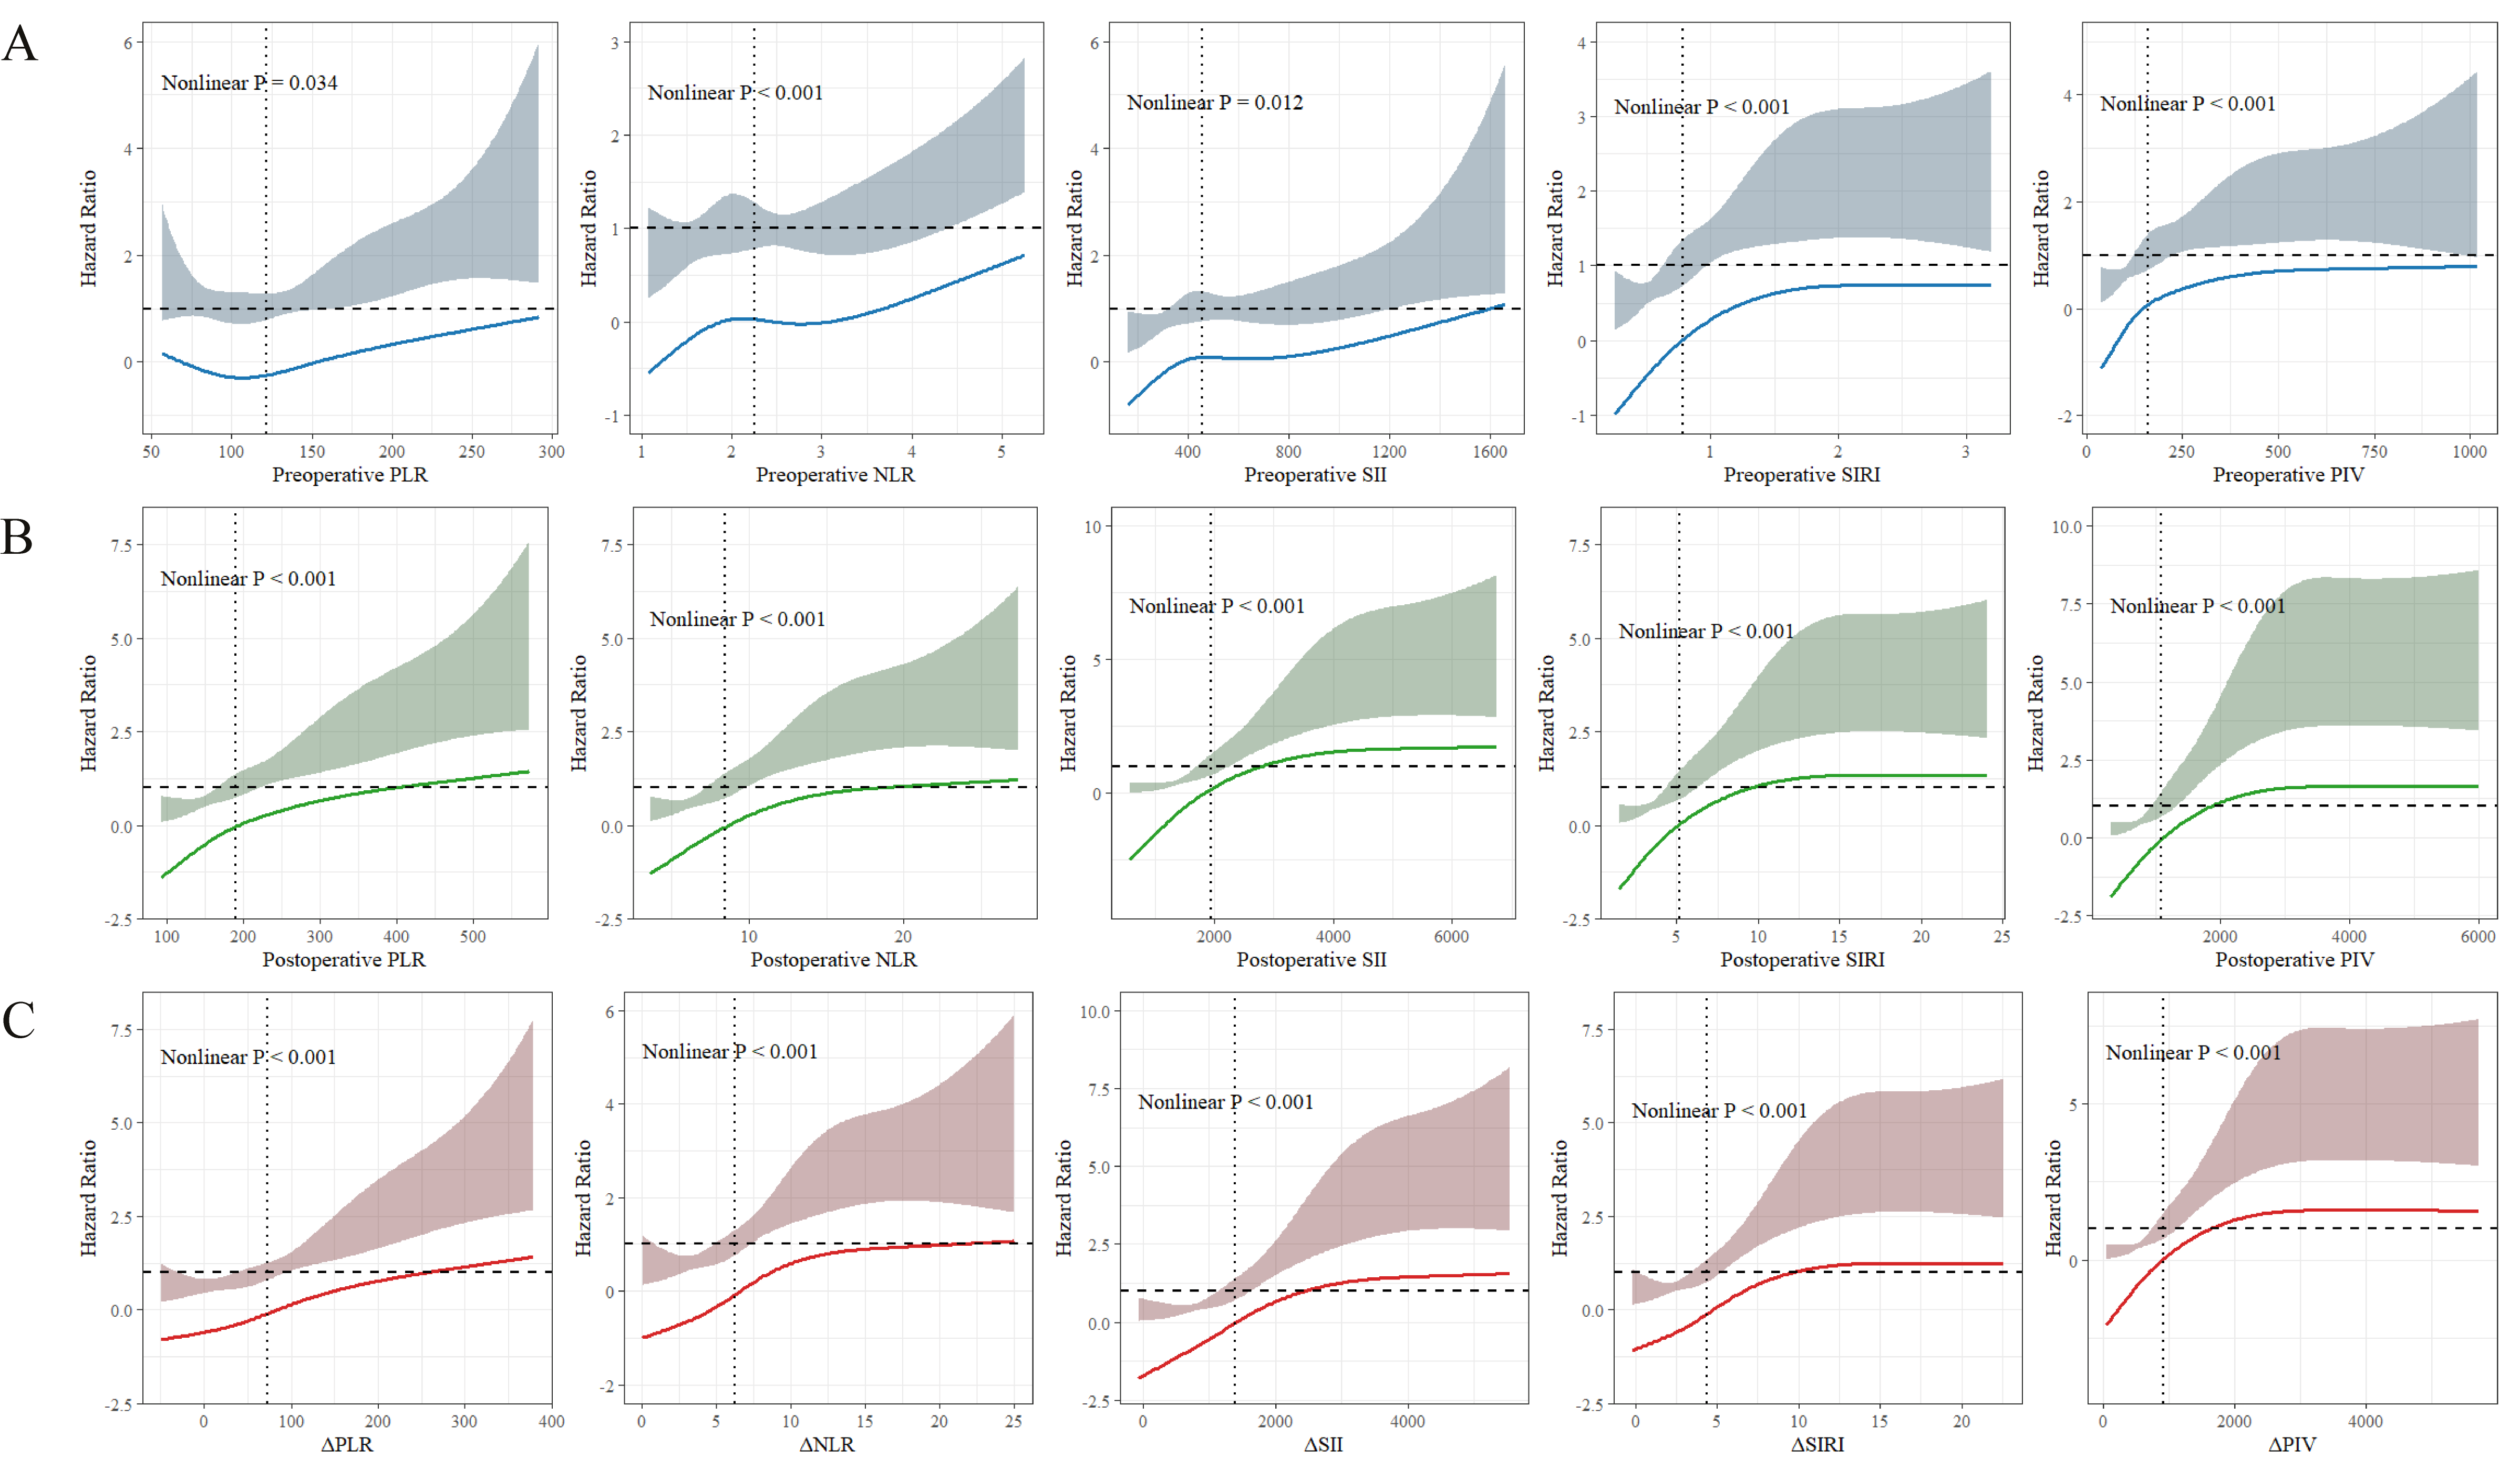
**

**Supplementary Figure 3. Restricted cubic spline (RCS) analysis of perioperative inflammatory indices**

Restricted cubic spline (RCS) analysis based on Cox proportional hazards models was used to evaluate nonlinear associations between inflammatory indices and overall survival.(A) RCS curves for preoperative inflammatory indices (PLR, NLR, SII, SIRI, PIV). (B) RCS curves for postoperative inflammatory indices (PLR, NLR, SII, SIRI, PIV). (C) RCS curves for dynamic changes in inflammatory indices (ΔPLR, ΔNLR, ΔSII, ΔSIRI, ΔPIV).


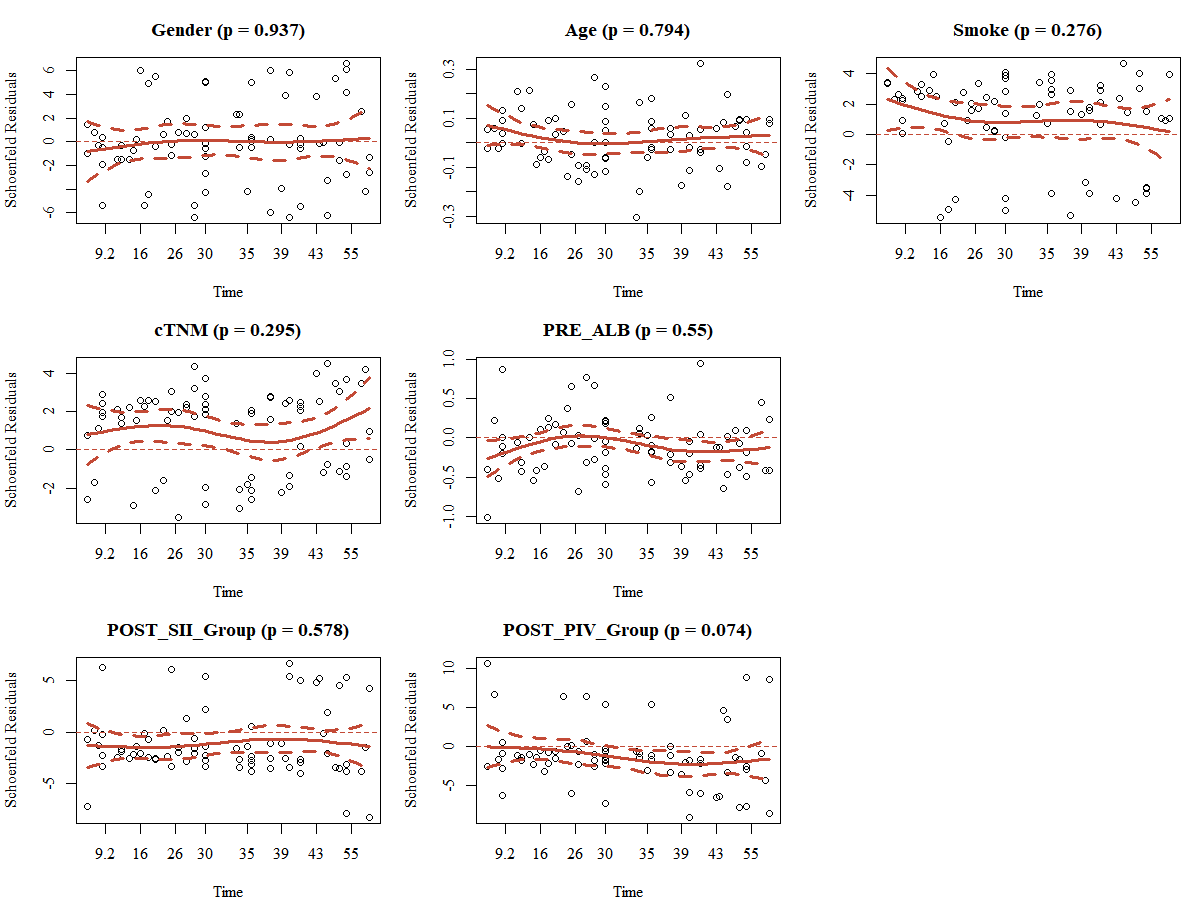


**Supplementary Figure 4. Proportional hazards (PH) assumption testing of final model variables**

Schoenfeld residual plots for variables included in the final nomogram model (Gender, Age, Smoking history, cTNM stage, Preoperative albumin, POST_SII group, POST_PIV group). No significant violation of the proportional hazards assumption was observed (all p > 0.05).

**
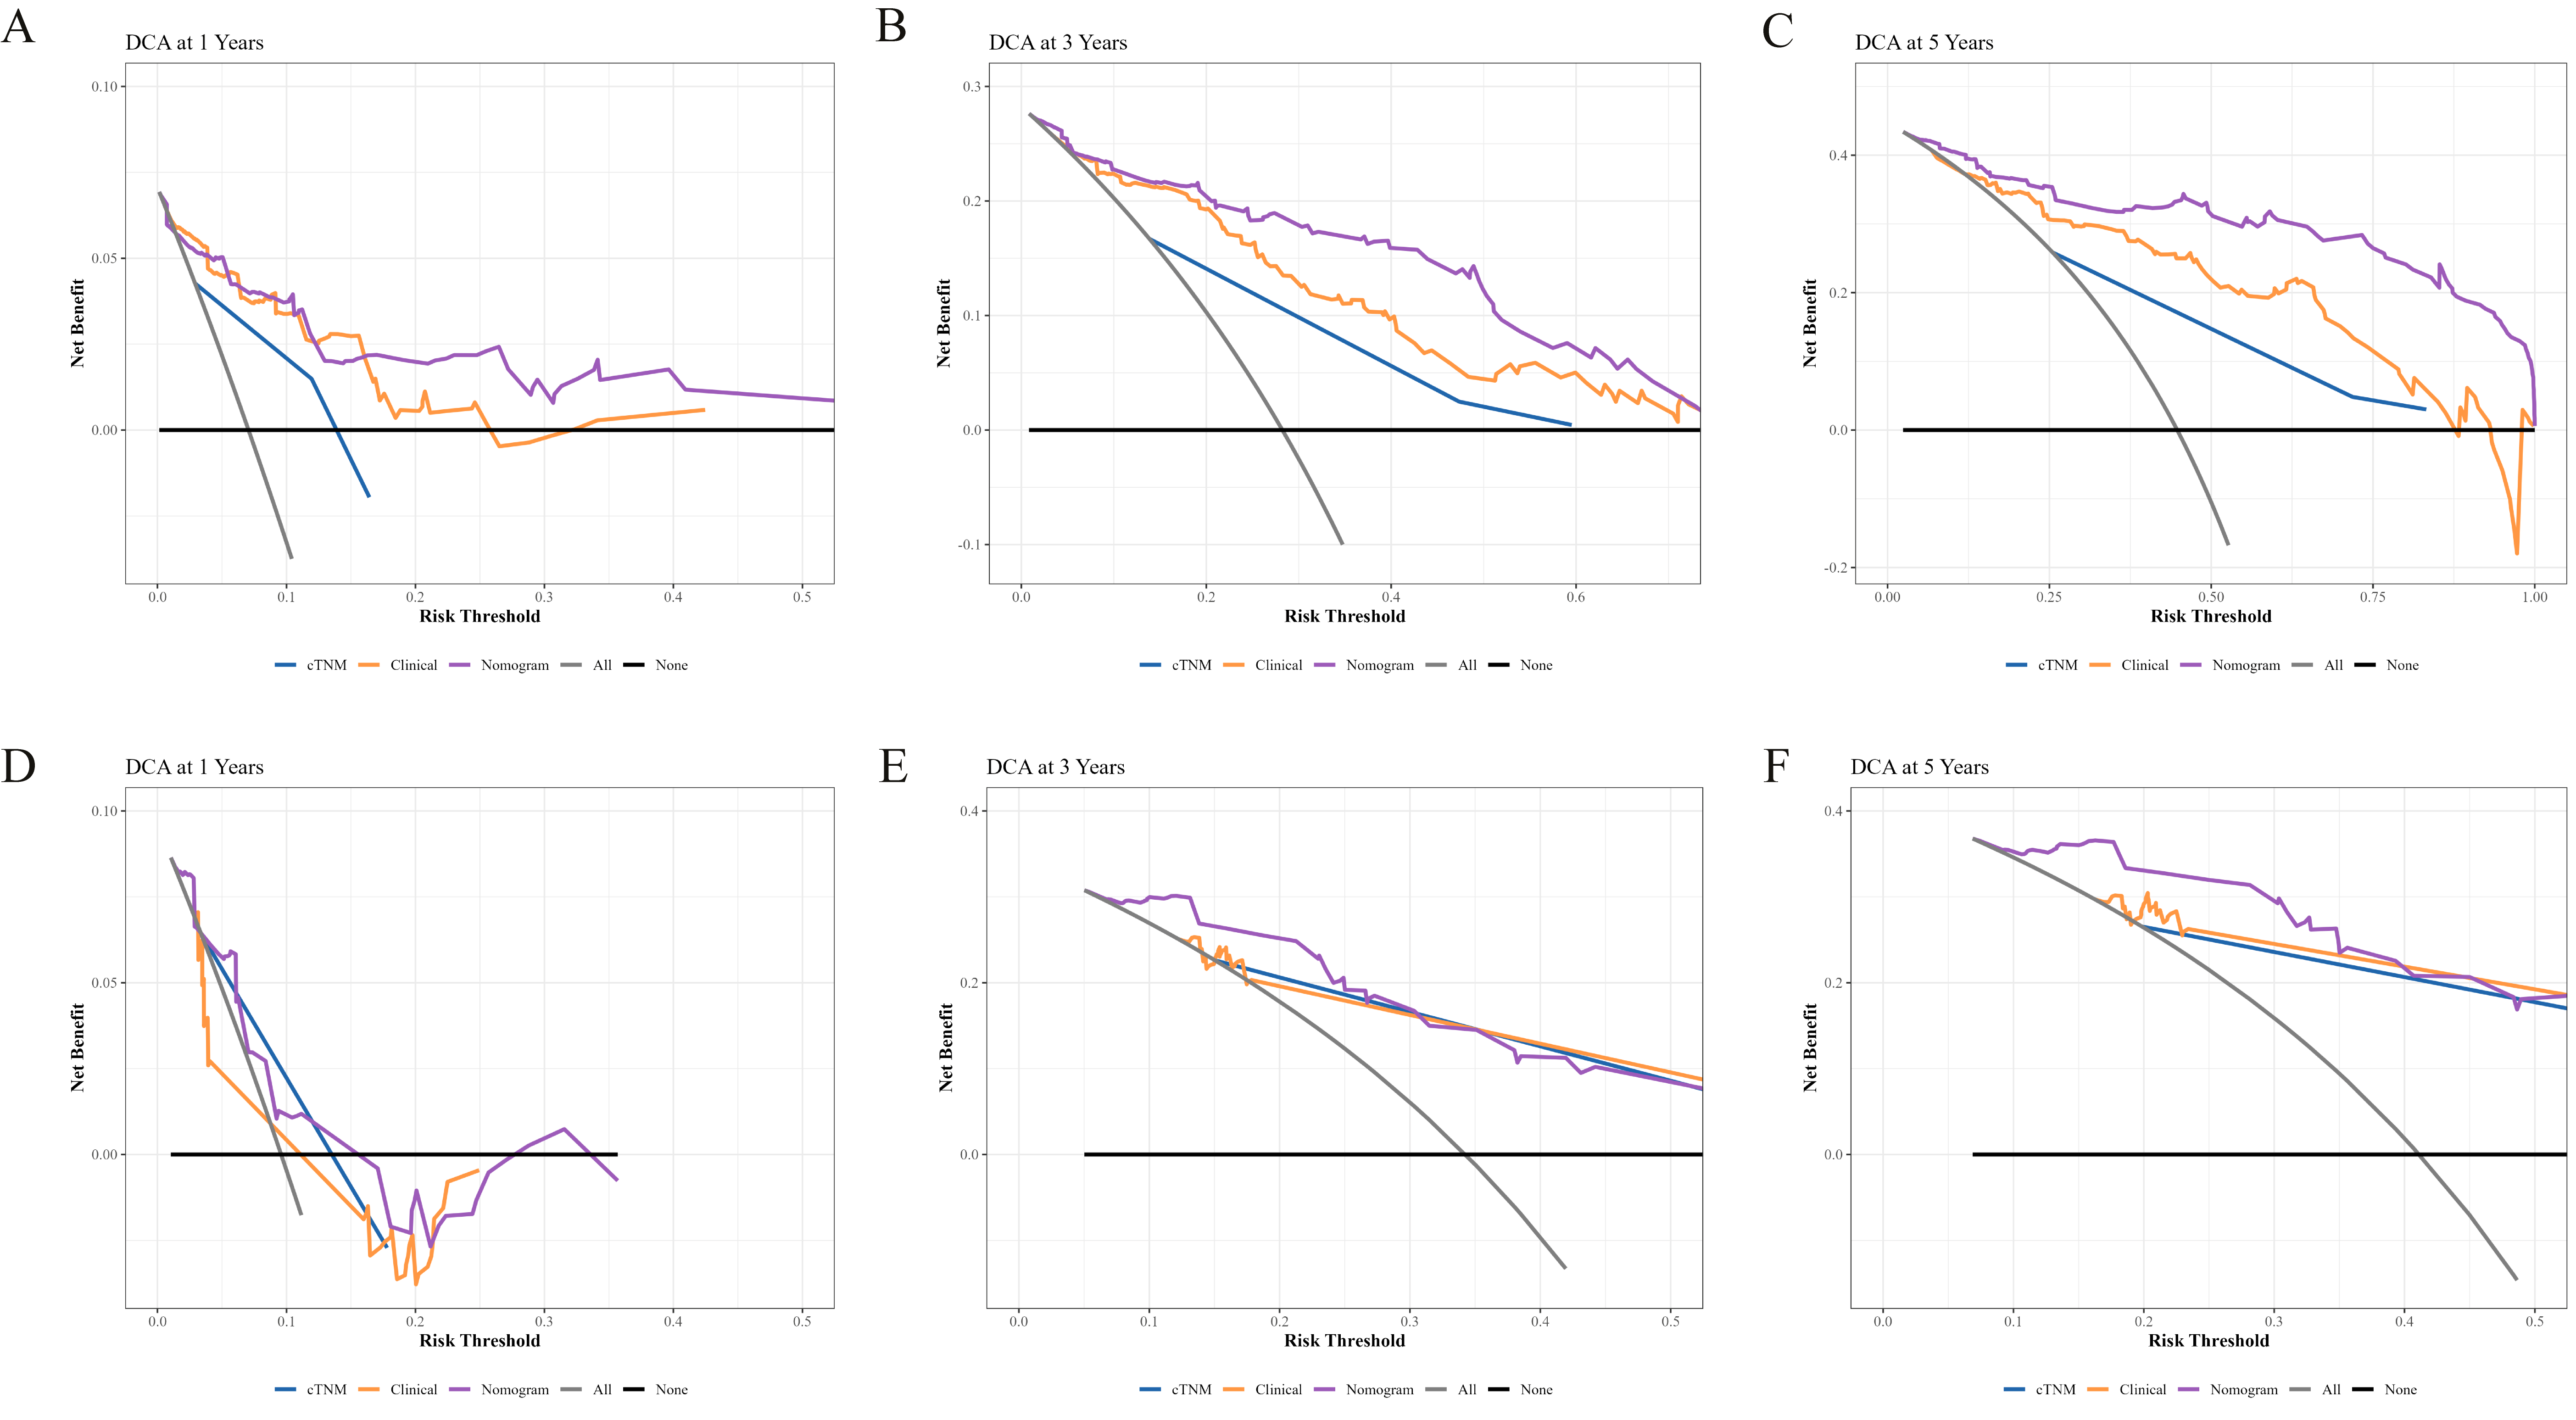
**

**Supplementary Figure 5. Impact of Age and Gender inclusion on net clinical benefit.**
Comparison of decision curve analyses (DCA) for nomogram, clinical, and TNM models before (A–C) and after (D–F) removing Age and Gender. (A–C) display DCA at 1-, 3-, and 5-year in the training cohort; (D–F) show corresponding curves in the validation cohort. The exclusion of Age and Gender resulted in a noticeable decline in net benefit across multiple timepoints, particularly in the validation cohort.

**Supplementary Table 1. Five-fold cross-validation of the final seven-variable Cox model in the training cohort.**

| Fold | Cindex | AUC_1year | AUC_3year | AUC_5year |
| --- | --- | --- | --- | --- |
| 1 | 0.835 | 0.281 | 0.889 | 0.931 |
| 2 | 0.871 | 0.935 | 0.883 | 0.960 |
| 3 | 0.850 | 0.742 | 0.890 | 0.976 |
| 4 | 0.795 | 0.925 | 0.810 | 0.831 |
| 5 | 0.872 | 1.000 | 0.905 | 0.963 |
| Mean±SD | 0.845±0.032 | 0.777±0.293 | 0.875±0.038 | 0.932±0.059 |

Time-dependent AUCs are reported at 1, 3, and 5 years. The model included Smoking History, cTNM stage, Preoperative Albumin, POST_SII, POST_PIV, Age, and Gender.

**Supplementary Table 2. 100 Times Repeated 70/30 random splits (N = 243).**

| Fold | Cindex | AUC_1year | AUC_3year | AUC_5year |
| --- | --- | --- | --- | --- |
| Mean±SD | 0.800±0.030 | 0.760±0.110 | 0.840±0.040 | 0.890±0.040 |
| 1 | 0.763 | 0.686 | 0.804 | 0.858 |
| 2 | 0.826 | 0.821 | 0.863 | 0.914 |
| 3 | 0.849 | 0.833 | 0.930 | 0.932 |
| 4 | 0.851 | 0.925 | 0.868 | 0.946 |
| 5 | 0.849 | 0.972 | 0.928 | 0.903 |
| 6 | 0.782 | 0.619 | 0.823 | 0.884 |
| 7 | 0.778 | 0.671 | 0.816 | 0.889 |
| 8 | 0.801 | 0.684 | 0.842 | 0.882 |
| 9 | 0.786 | 0.774 | 0.840 | 0.870 |
| 10 | 0.733 | 0.640 | 0.793 | 0.835 |
| 11 | 0.837 | 0.792 | 0.903 | 0.923 |
| 12 | 0.870 | 0.837 | 0.936 | 0.973 |
| 13 | 0.829 | 0.944 | 0.867 | 0.886 |
| 14 | 0.885 | 0.875 | 0.952 | 0.982 |
| 15 | 0.773 | 0.664 | 0.776 | 0.894 |
| 16 | 0.800 | 0.757 | 0.836 | 0.874 |
| 17 | 0.805 | 0.733 | 0.807 | 0.922 |
| 18 | 0.741 | 0.636 | 0.768 | 0.835 |
| 19 | 0.746 | 0.633 | 0.767 | 0.833 |
| 20 | 0.813 | 0.716 | 0.835 | 0.914 |
| 21 | 0.821 | 0.800 | 0.840 | 0.916 |
| 22 | 0.830 | 0.742 | 0.836 | 0.946 |
| 23 | 0.806 | 0.662 | 0.819 | 0.901 |
| 24 | 0.773 | 0.550 | 0.781 | 0.871 |
| 25 | 0.770 | 0.834 | 0.842 | 0.853 |
| 26 | 0.808 | 0.932 | 0.851 | 0.869 |
| 27 | 0.848 | 0.939 | 0.852 | 0.932 |
| 28 | 0.738 | 0.704 | 0.759 | 0.824 |
| 29 | 0.800 | 0.890 | 0.838 | 0.876 |
| 30 | 0.851 | 0.851 | 0.898 | 0.940 |
| 31 | 0.776 | 0.780 | 0.803 | 0.855 |
| 32 | 0.788 | 0.765 | 0.805 | 0.903 |
| 33 | 0.756 | 0.767 | 0.853 | 0.827 |
| 34 | 0.752 | 0.771 | 0.776 | 0.829 |
| 35 | 0.825 | 0.732 | 0.916 | 0.946 |
| 36 | 0.740 | 0.354 | 0.775 | 0.805 |
| 37 | 0.816 | 0.917 | 0.860 | 0.880 |
| 38 | 0.801 | 0.791 | 0.841 | 0.871 |
| 39 | 0.795 | 0.858 | 0.827 | 0.888 |
| 40 | 0.817 | 0.655 | 0.817 | 0.918 |
| 41 | 0.828 | 0.858 | 0.883 | 0.899 |
| 42 | 0.758 | 0.603 | 0.764 | 0.852 |
| 43 | 0.852 | 0.933 | 0.895 | 0.904 |
| 44 | 0.770 | 0.621 | 0.860 | 0.865 |
| 45 | 0.827 | 0.831 | 0.877 | 0.903 |
| 46 | 0.751 | 0.693 | 0.796 | 0.838 |
| 47 | 0.741 | 0.601 | 0.778 | 0.817 |
| 48 | 0.855 | 0.812 | 0.906 | 0.941 |
| 49 | 0.789 | 0.708 | 0.850 | 0.907 |
| 50 | 0.831 | 0.875 | 0.877 | 0.935 |
| 51 | 0.857 | 0.822 | 0.906 | 0.941 |
| 52 | 0.786 | 0.704 | 0.815 | 0.853 |
| 53 | 0.811 | 0.774 | 0.864 | 0.899 |
| 54 | 0.826 | 0.860 | 0.858 | 0.926 |
| 55 | 0.791 | 0.684 | 0.833 | 0.877 |
| 56 | 0.789 | 0.716 | 0.787 | 0.879 |
| 57 | 0.830 | 0.939 | 0.863 | 0.895 |
| 58 | 0.798 | 0.811 | 0.888 | 0.871 |
| 59 | 0.757 | 0.568 | 0.764 | 0.841 |
| 60 | 0.780 | 0.745 | 0.859 | 0.895 |
| 61 | 0.777 | 0.801 | 0.808 | 0.862 |
| 62 | 0.786 | 0.695 | 0.823 | 0.879 |
| 63 | 0.771 | 0.701 | 0.814 | 0.871 |
| 64 | 0.835 | 0.832 | 0.872 | 0.931 |
| 65 | 0.800 | 0.623 | 0.829 | 0.902 |
| 66 | 0.848 | 0.676 | 0.889 | 0.934 |
| 67 | 0.783 | 0.739 | 0.827 | 0.878 |
| 68 | 0.821 | 0.722 | 0.847 | 0.927 |
| 69 | 0.759 | 0.750 | 0.811 | 0.832 |
| 70 | 0.806 | 0.686 | 0.862 | 0.914 |
| 71 | 0.800 | 0.898 | 0.838 | 0.875 |
| 72 | 0.822 | 0.826 | 0.866 | 0.914 |
| 73 | 0.810 | 0.734 | 0.864 | 0.916 |
| 74 | 0.825 | 0.804 | 0.876 | 0.899 |
| 75 | 0.779 | 0.770 | 0.838 | 0.829 |
| 76 | 0.801 | 0.819 | 0.894 | 0.856 |
| 77 | 0.773 | 0.786 | 0.833 | 0.834 |
| 78 | 0.793 | 0.632 | 0.810 | 0.897 |
| 79 | 0.800 | 0.786 | 0.846 | 0.864 |
| 80 | 0.795 | 0.768 | 0.785 | 0.909 |
| 81 | 0.778 | 0.746 | 0.766 | 0.877 |
| 82 | 0.851 | 0.919 | 0.906 | 0.908 |
| 83 | 0.775 | 0.645 | 0.774 | 0.881 |
| 84 | 0.780 | 0.730 | 0.828 | 0.869 |
| 85 | 0.852 | 0.876 | 0.900 | 0.963 |
| 86 | 0.804 | 0.867 | 0.836 | 0.875 |
| 87 | 0.783 | 0.646 | 0.857 | 0.857 |
| 88 | 0.827 | 0.752 | 0.868 | 0.927 |
| 89 | 0.828 | 0.841 | 0.878 | 0.925 |
| 90 | 0.805 | 0.680 | 0.881 | 0.881 |
| 91 | 0.753 | 0.700 | 0.780 | 0.859 |
| 92 | 0.830 | 0.820 | 0.876 | 0.941 |
| 93 | 0.792 | 0.811 | 0.878 | 0.863 |
| 94 | 0.800 | 0.376 | 0.827 | 0.918 |
| 95 | 0.798 | 0.691 | 0.838 | 0.895 |
| 96 | 0.823 | 0.958 | 0.870 | 0.892 |
| 97 | 0.761 | 0.689 | 0.808 | 0.836 |
| 98 | 0.781 | 0.763 | 0.834 | 0.861 |
| 99 | 0.810 | 0.586 | 0.826 | 0.909 |
| 100 | 0.830 | 0.814 | 0.881 | 0.895 |

Time-dependent AUCs are reported at 1, 3, and 5 years. The model included Smoking History, cTNM stage, Preoperative Albumin, POST_SII, POST_PIV, Age, and Gender.
